# Supplementary material for: Effects of tumor-specific CAP1 expression and body constitution on clinical outcomes in patients with early breast cancer
Source: Springer Nature journal article supplement (doi:10.1186/s13058-020-01307-5), 2020-06-19
Supplement: MOESM1 [file 18101774]

**A****T47D**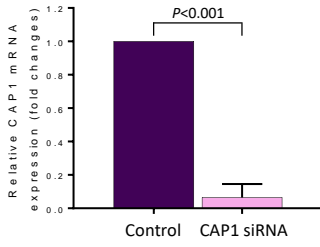**MDA-MB-231**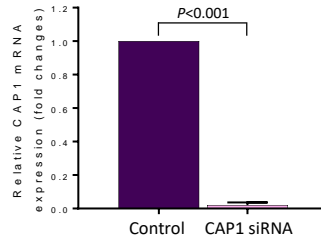**B**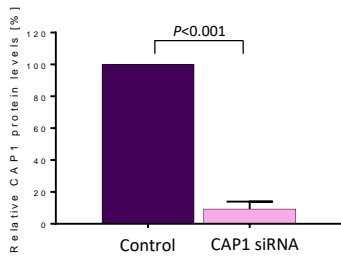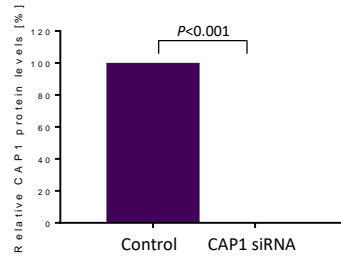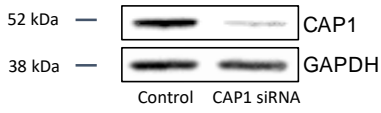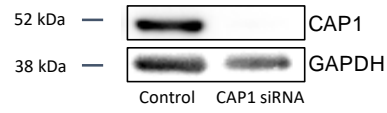**C**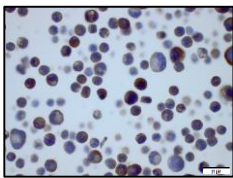

Control

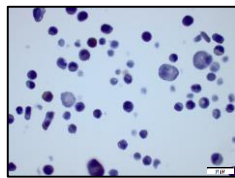

CAP1 siRNA

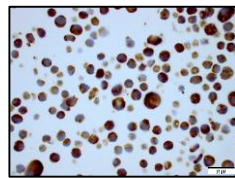

Control

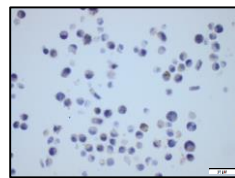

CAP1 siRNA
