# Supplementary material for: Effects of tumor-specific CAP1 expression and body constitution on clinical outcomes in patients with early breast cancer
Source: Springer Nature journal article supplement (doi:10.1186/s13058-020-01307-5), 2020-06-19
Supplement: MOESM2 [file 18101774]

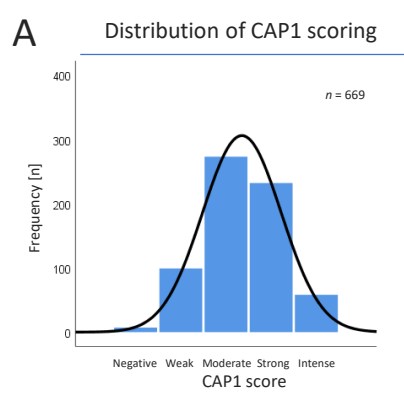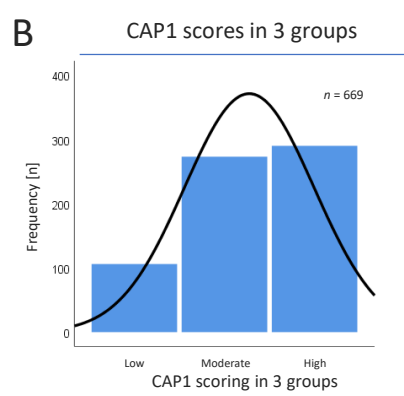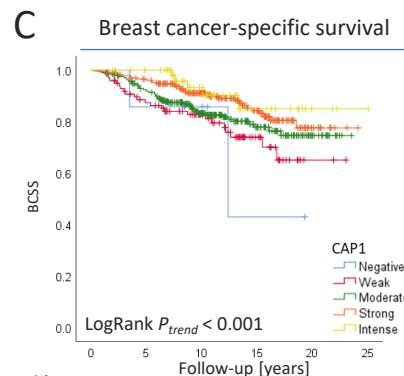

| At risk  | 0   | 5   | 10  | 15 | 20 | 25 | NoE |
|----------|-----|-----|-----|----|----|----|-----|
| Negative | 7   | 6   | 4   | 1  | 0  | 0  | 2   |
| Weak     | 99  | 79  | 54  | 22 | 2  | 0  | 23  |
| Moderate | 273 | 238 | 145 | 64 | 16 | 0  | 49  |
| Strong   | 232 | 216 | 146 | 80 | 14 | 0  | 31  |
| Intense  | 58  | 54  | 33  | 12 | 3  | 1  | 5   |

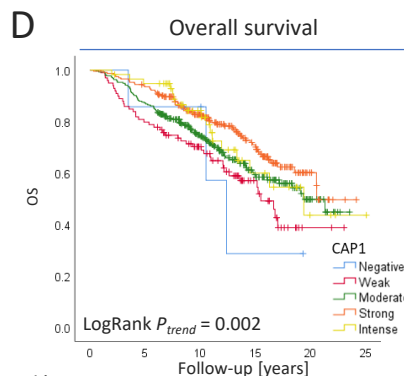

| At risk  | 0   | 5   | 10  | 15 | 20 | 25 | NoE |
|----------|-----|-----|-----|----|----|----|-----|
| Negative | 7   | 6   | 4   | 1  | 0  | 0  | 3   |
| Weak     | 99  | 79  | 54  | 22 | 2  | 0  | 44  |
| Moderate | 273 | 238 | 145 | 64 | 16 | 0  | 95  |
| Strong   | 232 | 216 | 146 | 80 | 14 | 0  | 65  |
| Intense  | 58  | 54  | 33  | 12 | 3  | 1  | 17  |
