# Supplementary material for: Effects of tumor-specific CAP1 expression and body constitution on clinical outcomes in patients with early breast cancer
Source: Springer Nature journal article supplement (doi:10.1186/s13058-020-01307-5), 2020-06-19
Supplement: MOESM3 [file 18101774]

### Additional file 3.

Distribution of breast cancer treatment and CAP1 tumor-specific expression.

| Patient characteristics<br><i>n</i> (%) or median (IQR) | Patients included in TMA<br>( <i>n</i> =718) |                              |                                   |                               | <i>p</i> <sub>trend</sub> | Non-assessable<br>( <i>n</i> =49) | Not included<br>in TMA<br>( <i>n</i> =192) |
|---------------------------------------------------------|----------------------------------------------|------------------------------|-----------------------------------|-------------------------------|---------------------------|-----------------------------------|--------------------------------------------|
|                                                         | All patients<br>( <i>n</i> =910)             | Low CAP1<br>( <i>n</i> =106) | Moderate CAP1<br>( <i>n</i> =273) | High CAP1<br>( <i>n</i> =290) |                           |                                   |                                            |
| <b>Surgical procedure</b>                               |                                              |                              |                                   |                               |                           |                                   |                                            |
| Mastectomy                                              | 362 (41.7)                                   | 50 (49.0)                    | 119 (45.4)                        | 112 (39.3)                    | 0.060 <sup>b</sup>        | 23 (47.9)                         | 58 (33.7)                                  |
| Lumpectomy                                              | 2 (0.2)                                      | 0 (0.0)                      | 0 (0.0)                           | 0 (0.0)                       |                           | 0 (0.0)                           | 2 (1.2)                                    |
| Partial mastectomy                                      | 504 (58.0)                                   | 52 (51.0)                    | 142 (54.2)                        | 173 (60.7)                    |                           | 25 (52.1)                         | 112 (65.1)                                 |
| Biopsy only                                             | 1 (0.1)                                      | 0 (0.0)                      | 1 (0.4)                           | 0 (0.0)                       |                           | 0 (0.0)                           | 0 (0.0)                                    |
| Missing                                                 | 41                                           | 3                            | 10 (9+1)                          | 4                             |                           | 1                                 | 20                                         |
| <b>Surgical procedure,<br/>axilla</b>                   |                                              |                              |                                   |                               |                           |                                   |                                            |
| No, axillary dissection                                 | 79 (9.1)                                     | 5 (5.0)                      | 10 (3.8)                          | 20 (7.0)                      | 0.889 <sup>b</sup>        | 4 (8.5)                           | 40 (22.9)                                  |
| Yes, axillary dissection                                | 505 (58.0)                                   | 63 (62.4)                    | 160 (61.1)                        | 164 (57.5)                    |                           | 32 (68.1)                         | 86 (49.1)                                  |
| Sentinel node                                           | 286 (32.9)                                   | 33 (32.7)                    | 92 (35.1)                         | 101 (35.4)                    |                           | 11 (23.4)                         | 49 (28.0)                                  |
| Missing                                                 | 40                                           | 0                            | 0                                 | 0                             |                           | 0                                 | 17                                         |
| <b>Chemotherapy</b>                                     |                                              |                              |                                   |                               |                           |                                   |                                            |
| Yes                                                     | 126 (15.3)                                   | 21 (21.0)                    | 47 (19.0)                         | 39 (14.8)                     | 0.115 <sup>b</sup>        | 4 (8.9)                           | 15 (9.0)                                   |
| No                                                      | 697 (84.7)                                   | 79 (79.0)                    | 200 (81.0)                        | 225 (85.2)                    |                           | 41 (91.1)                         | 152 (91.0)                                 |
| Missing                                                 | 87                                           | 1                            | 0                                 | 4                             |                           | 0                                 | 25                                         |
| <b>Radiotherapy</b>                                     |                                              |                              |                                   |                               |                           |                                   |                                            |
| Yes                                                     | 499 (60.5)                                   | 62 (62.6)                    | 160 (64.8)                        | 165 (61.8)                    | 0.723 <sup>b</sup>        | 24 (53.3)                         | 88 (52.7)                                  |
| No                                                      | 326 (39.5)                                   | 37 (37.4)                    | 87 (35.2)                         | 102 (38.2)                    |                           | 24 (46.7)                         | 79 (47.3)                                  |
| Missing                                                 | 85                                           | 2                            | 1                                 | 1                             |                           | 0                                 | 25                                         |
| <b>Any endocrine<br/>therapy</b>                        |                                              |                              |                                   |                               |                           |                                   |                                            |
| None                                                    | 408 (46.5)                                   | 32 (30.8)                    | 97 (36.1)                         | 132 (46.5)                    | 0.002 <sup>b</sup>        | 34 (69.4)                         | 113 (65.7)                                 |
| Yes                                                     | 470 (53.5)                                   | 72 (69.2)                    | 172 (63.9)                        | 152 (53.5)                    |                           | 15 (30.6)                         | 59 (34.3)                                  |
| Missing                                                 | 32                                           | 2                            | 4                                 | 6                             |                           | 0                                 | 20                                         |

<sup>a</sup>Jonckheere-Terpstra test. <sup>b</sup>Linear-by-linear association test. *P*-value <0.05 in bold.
