# Supplementary material for: Effects of tumor-specific CAP1 expression and body constitution on clinical outcomes in patients with early breast cancer
Source: Springer Nature journal article supplement (doi:10.1186/s13058-020-01307-5), 2020-06-19

CAP1 — Low — Moderate — High

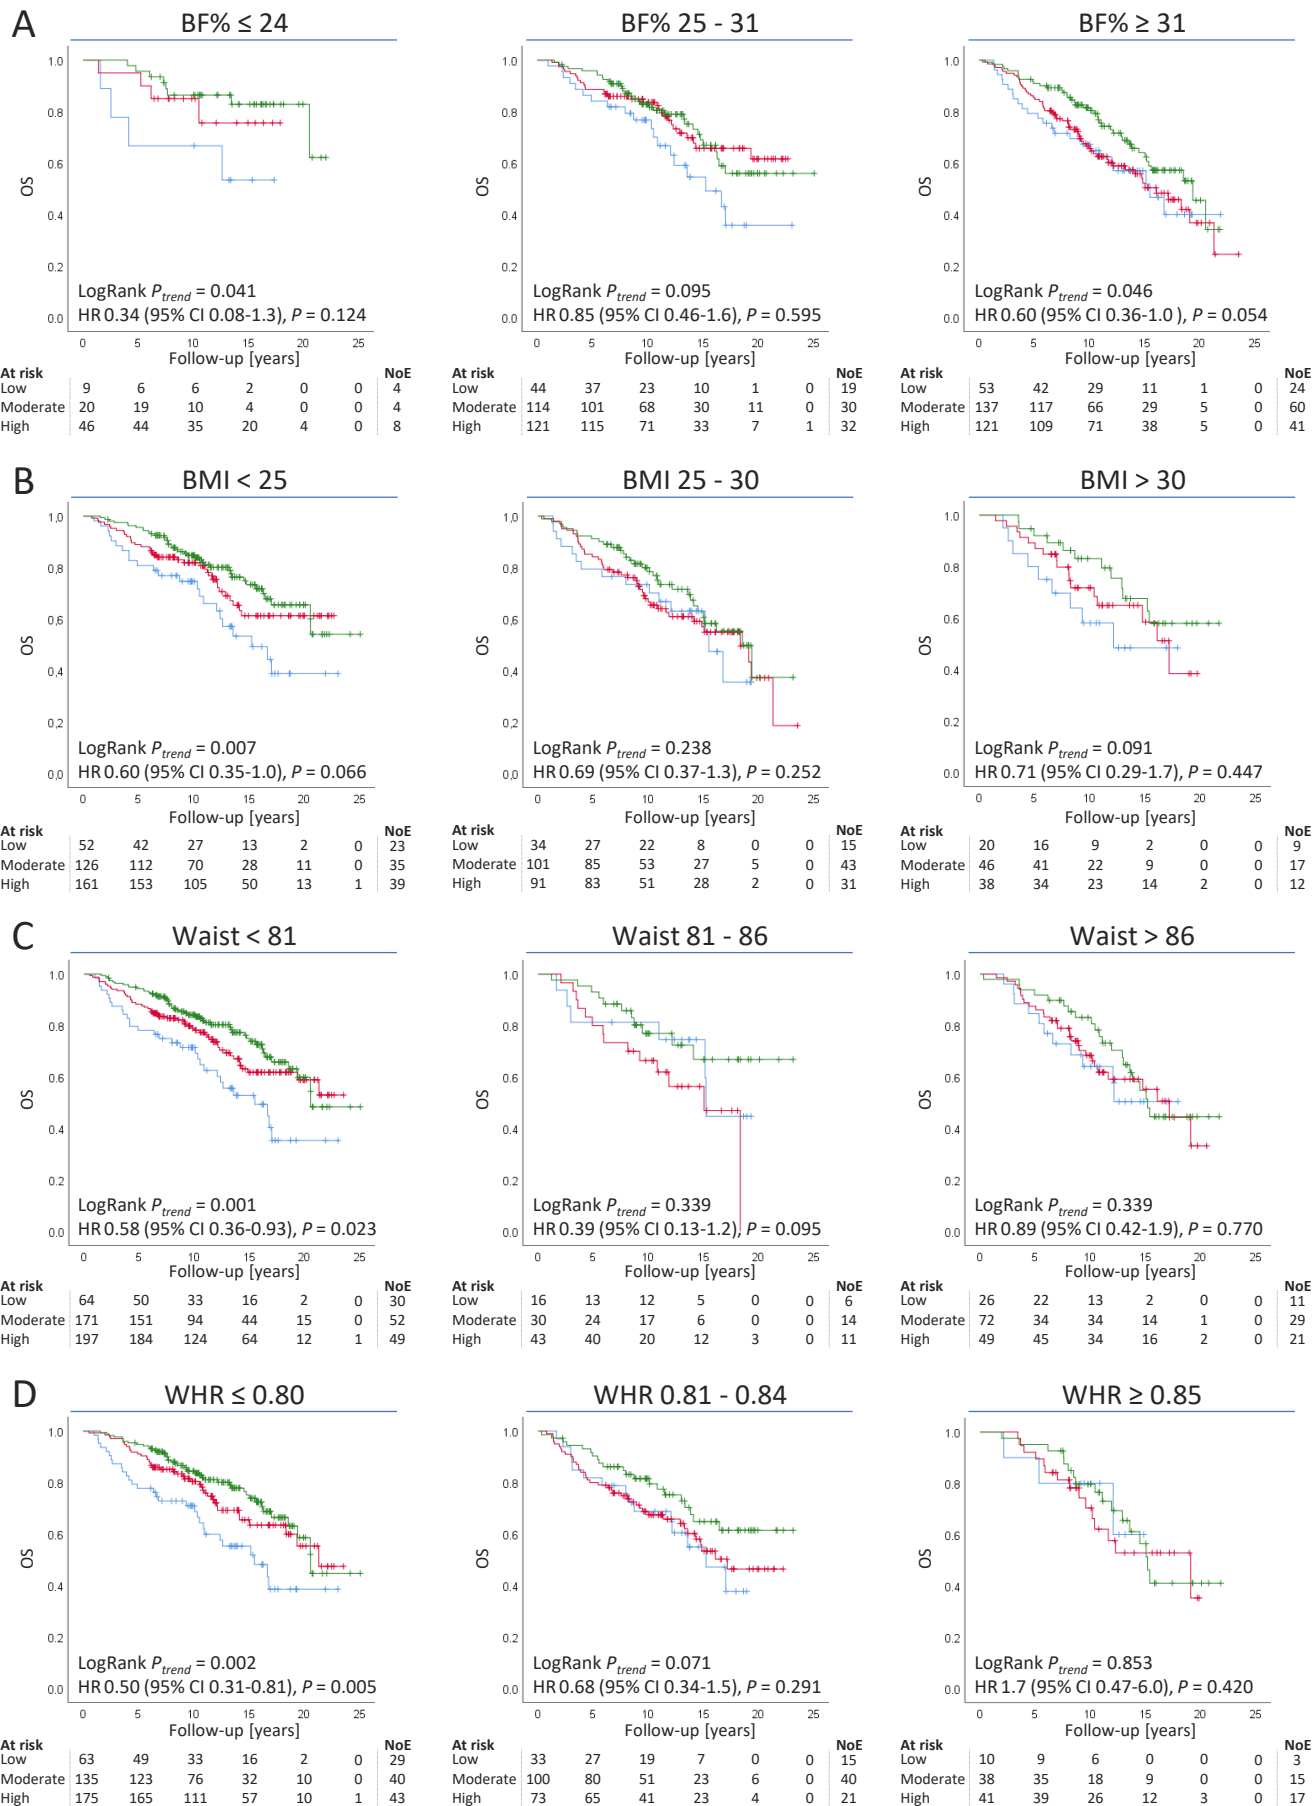

Supplement: MOESM4 [file 18101774]
